# Supplementary material
Source: PubMed Central journal article supplement (PMC6094108)
Supplement: pnas.1806200115.sapp.pdf [file pnas.1806200115.sapp.pdf]

## Supplementary Information for

### Analysis of CD8+ T Cell Response During the 2013-2016 Ebola Epidemic in West Africa

Saori Sakabe<sup>\*1</sup>, Brian M. Sullivan<sup>\*1,11</sup>, Jessica Hartnett<sup>2</sup>, Refugio Robles<sup>1,3</sup>, Karthik Gangavarapu<sup>4</sup>, Beatrice Cubitt<sup>1</sup>, Brian Ware<sup>1</sup>, Dylan Kotliar<sup>5</sup>, Luis Branco<sup>6</sup>, Augustine Goba<sup>7,8</sup>, Mambu Momoh<sup>7,8,9</sup>, John Demby Sandi<sup>7,8</sup>, Lansana Kanneh<sup>7,8</sup>, Donald S. Grant<sup>7,8</sup>, Robert Garry<sup>2</sup>, Kristian Andersen<sup>1,3</sup>, Juan Carlos de la Torre<sup>1</sup>, Pardis Sabeti<sup>5</sup>, John Schieffelin<sup>10</sup>, and Michael B.A. Oldstone<sup>1,11</sup>

Michael B.A. Oldstone  
Email: [mbaobo@scripps.edu](mailto:mbaobo@scripps.edu)

#### **This PDF file includes:**

Figs. S1 to S2  
Tables S1 to S4

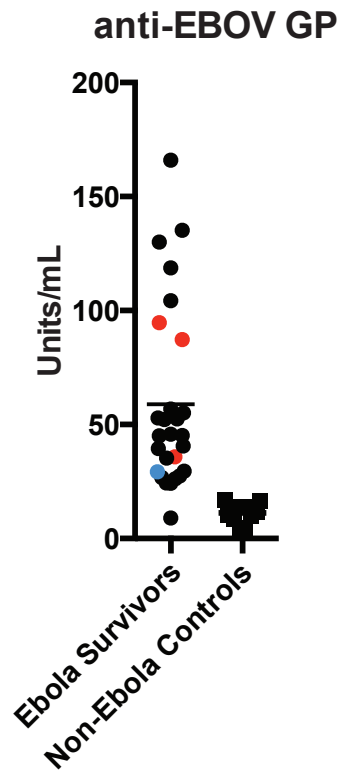

**Figure S1.** Results from ELISAs from 27 of 32 individuals tested and 10 non-EVD population controls. Only one individual with a history of EVD did not have EBOV GP specific responses but nevertheless had CD8<sup>+</sup> T cells that responded to VP24 and NP. Three individuals that failed to respond to rscVSV encoding EBOV proteins (red) and one individual with indeterminate responses (blue) are shown.

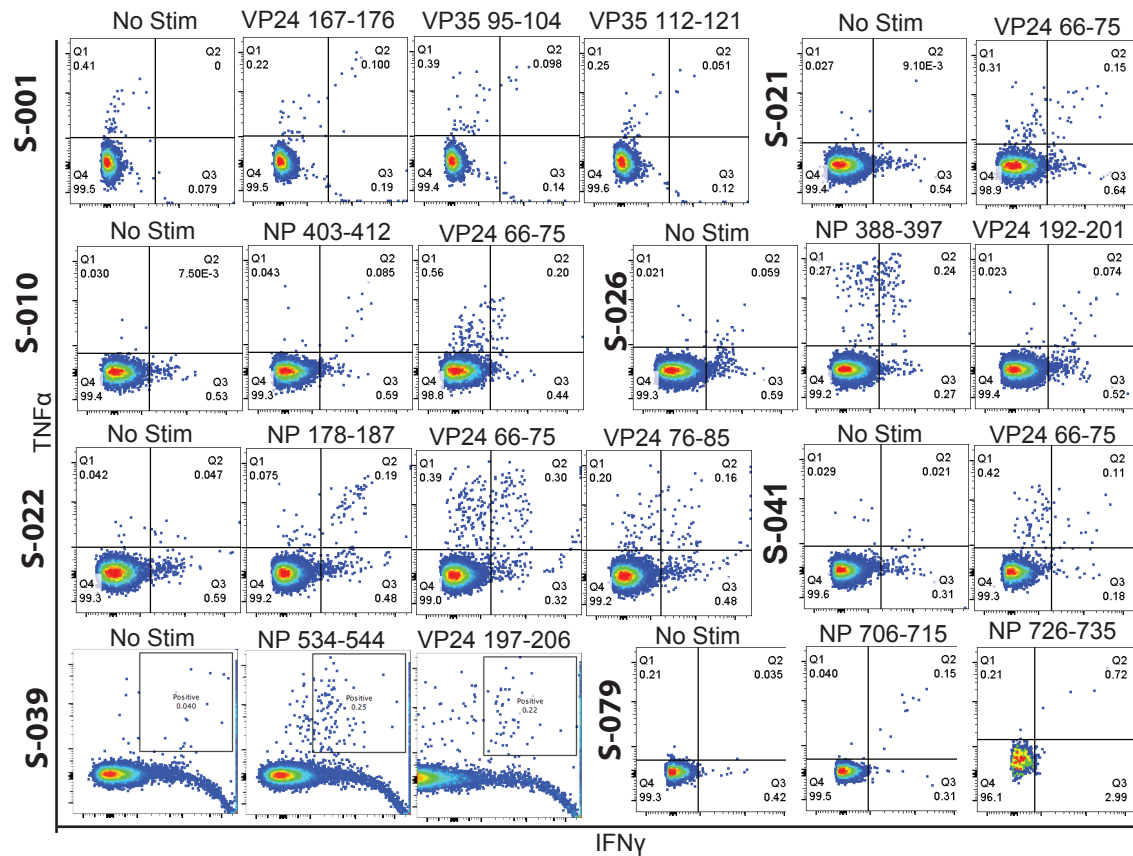

**Figure S2.** Results from 10a.a. epitope identification. Peptides (10  $\mu\text{g/ml}$ ) were added to PBMC cultures and stimulated for 5 hours. Brefeldin A was added after the first hour of incubation. Intracellular levels of IFN- $\gamma$  and TNF- $\alpha$  of CD8+ T cells were assessed by flow cytometry. Data for 12 unique epitopes from 8 subjects are shown.

**Table S1.** Number of observed and total number of HLA-A, -B and -C alleles sequenced from Ebola survivors (n=32).

|              | <b>Observed</b> | <b>Total</b> |
|--------------|-----------------|--------------|
| <b>A</b>     | 20              | 64           |
| <b>B</b>     | 24              | 64           |
| <b>C</b>     | 18              | 64           |
| <b>Total</b> | 62              | 192          |

**Table S2.** Most frequent ( $f > 5\%$ ) HLA-A, -B and -C alleles observed in EVD survivors (n=32). All alleles in the list, except for the one shown in bold font, are Common Well-Documented (CWD) alleles in the International ImMunoGeneTics Information System (IMGT)/HLA Database.

| <b>Loci</b> | <b>HLA</b>      | <b>Allele</b> | <b>Allele Counts</b> |
|-------------|-----------------|---------------|----------------------|
| <b>A</b>    | A*300101        | 0.2031        | 13                   |
|             | A*300201        | 0.1562        | 10                   |
|             | A*020101        | 0.0938        | 6                    |
|             | A*740101        | 0.0938        | 6                    |
|             | A*680201        | 0.0625        | 4                    |
| <b>B</b>    | B*530101        | 0.125         | 8                    |
|             | B*420101        | 0.1094        | 7                    |
|             | B*350101        | 0.0938        | 6                    |
|             | B*070201        | 0.0781        | 5                    |
|             | B*440301        | 0.0781        | 5                    |
|             | B*080101        | 0.0625        | 4                    |
| <b>C</b>    | C*160101        | 0.1719        | 11                   |
|             | C*040101        | 0.1406        | 9                    |
|             | <b>C*170101</b> | 0.1406        | 9                    |
|             | C*070201        | 0.0938        | 6                    |
|             | C*030202        | 0.0781        | 5                    |
|             | C*060201        | 0.0625        | 4                    |

**Table S3:** Epitopes and MHC Expression

| <b>NP 41-60</b> |            |            |
|-----------------|------------|------------|
| A*30:01:01      | B*08:01:01 | C*07:02:01 |
| A*30:02:01      | B*52:01:02 | C*16:01:01 |
| A*03:01:01:01   | B*44:03:01 | C*03:02:02 |
| A*30:02:01:01   | B*82:01    | C*03:03:01 |
| A*03:01:01      | B*42:02:01 | C*03:03:01 |
| A*30:01:01      | B*44:03:01 | C*17:01:01 |
| A*30:01:01      | B*42:01:01 | C*04:01:01 |
| A*68:02:01      | B*53:01:01 | C*17:01:01 |

| <b>NP 54-81</b> |            |            |
|-----------------|------------|------------|
| A*26:01:01      | B*42:01:01 | C*07:18    |
| A*30:02:01      | B*58:01:01 | C*17:01:01 |
| A*02:02:01      | B*07:02:01 | C*06:02:01 |
| A*30:02:01      | B*53:01:01 | C*07:02:01 |
| A*36:01         | B*07:02:01 | C*03:02:02 |
| A*74:01:01      | B*82:02:01 | C*15:05:02 |

| <b>VP24 66-75</b> |            |            |
|-------------------|------------|------------|
| A*02:05:01        | B*07:02:01 | C*07:02:01 |
| A*74:01:01        | B*07:02:01 | C*15:05:02 |
| A*30:01:01        | B*42:01:01 | C*04:01:01 |
| A*68:02:01        | B*53:01:01 | C*17:01:01 |
| A*02:01:01        | B*35:01:01 | C*04:01:01 |
| A*30:02:01        | B*53:01:01 | C*04:01:01 |
| A*23:01:01        | B*07:06:01 | C*07:02:01 |
| A*24:02:01        | B*45:01:01 | C*16:01:01 |

**Table S4.**

| <b>Peptide Epitopes</b> | <b>Predicted Restriction</b>                                |
|-------------------------|-------------------------------------------------------------|
| NP 178-187              | HLA-A*30:02                                                 |
| NP 388-397              | HLA-C*02:10                                                 |
| NP 535-44               | HLA-B*15:03                                                 |
| NP 706-715              | HLA-C*05:01                                                 |
| NP 726-735              | HLA-B*08:01                                                 |
| VP24 66-75              | HLA-B*07:02,<br>HLA-B*07:06,<br>HLA-B*42:01,<br>HLA-B*53:01 |
| VP24 76-85              | HLA-B*53:01 or<br>HLA-B*35:01                               |
| VP24 167-76             | HLA-B*15:10                                                 |
| VP24 192-201            | HLA-C*02:10                                                 |
| VP24 197-206            | HLA-A*74:01                                                 |
| VP35 95-104             | HLA-A*68:02 or<br>HLA-B*35:01                               |
| VP35 112-121            | HLA-C*03:04                                                 |
